# Supplementary material
Source: Springer Nature journal article supplement (https://www.springermedizin.de/resource/supplementary/12876_2012_850_MOESM3_ESM.pdf/9437622)
Supplement: MOESM3 [file 9437622]

# CONSORT Flow Diagram

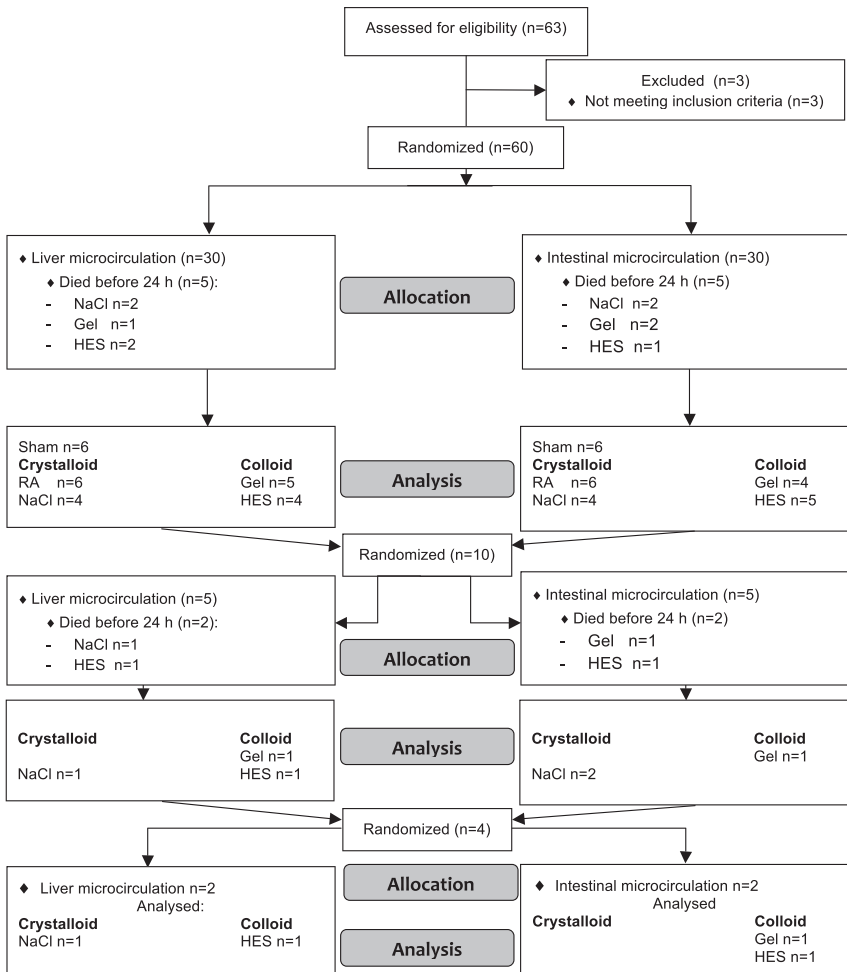

Endpoint of study: n=6 per group analysed for liver- and intestinal microcirculation
